# Supplementary material for: PTEN activation contributes to neuronal and synaptic engulfment by microglia in tauopathy
Source: PubMed Central journal article supplement (PMC7300099; doi:10.1007/s00401-020-02151-9), 2020-03-31

**Supplemental Table 1** Reagent and resource list.

| Reagent or Resource                              | Source          | Identifier       |                        |
|--------------------------------------------------|-----------------|------------------|------------------------|
| <b>Antibodies</b>                                |                 |                  | <b>Dilution</b>        |
| PSD95 (Clone K28/43)                             | Millipore       | RRID:AB_11212169 | 1:1000 WB              |
| PSD95 (D27E11) XP                                | Cell Signalling | RRID:AB_2292883  | 1:500 IHC              |
| PTEN (138G6)                                     | Cell Signalling | RRID:AB_390810   | 1:1000 WB<br>1:100 IHC |
| Phospho-PTEN (Ser380/Thr382/383)                 | Cell Signalling | RRID:AB_331411   | 1:1000 WB              |
| Cleaved Caspase-3 (Asp175) (5A1E)                | Cell Signalling | RRID:AB_2070042  | 1:1000 IHC             |
| C1q                                              | Abcam           | RRID:AB_2732849  | 1:1000 IHC             |
| MAP2                                             | Abcam           | RRID:AB_2138147  | 1:1000 IHC             |
| Total Tau                                        | DAKO            | RRID:AB_10013724 | 1:1000 WB              |
| Total Human Tau (HT7)                            | ThermoFisher    | RRID:AB_2314654  | 1:5000 WB              |
| Phospho-Tyr18 Tau (Tyr18)                        | MediMabs        | 1944110227-P     | 1:1000<br>WB/IHC       |
| Phospho-Ser396 Tau                               | Thermofisher    | RRID:AB_2533745  | 1:1000 WB              |
| Phospho-Tyr397 FAK                               | Cell Signalling | RRID:AB_10891442 | 1:500 WB               |
| FAK                                              | Cell Signalling | RRID:AB_2269034  | 1:500 WB               |
| Phospho-Ser473 AKT                               | Cell Signalling | RRID:AB_2315049  | 1:1000 WB              |
| AKT                                              | Cell Signalling | RRID:AB_329827   | 1:1000 WB              |
| CD68                                             | BioRad          | RRID:AB_324217   | 1:1000 IHC             |
| AT8 Tau                                          | ThermoFisher    | RRID:AB_223647   | 1:1000 WB              |
| AT180 Tau                                        | ThermoFisher    | RRID:AB_223649   | 1:1000 WB              |
| Phospho-Ser404 Tau                               | ThermoFisher    | RRID:AB_2532674  | 1:1000 WB              |
| Iba1                                             | Wako            | RRID:AB_839504   | 1:1000 IHC             |
| Cd11b                                            | Abcam           | RRID:AB_306831   | 1:1000 IHC             |
| Anti-rat IgG (H+L), (Alexa Fluor® 488 Conjugate) | Cell Signalling | RRID:AB_10693769 | 1:1000 IHC             |
| Goat anti-Mouse Alexa Fluor 488                  | ThermoFisher    | RRID:AB_2534069  | 1:1000 IHC             |
| Goat anti-Rabbit Alexa Fluor 555                 | ThermoFisher    | RRID:AB_2536100  | 1:1000 IHC             |
| Goat anti-Chicken Alexa Fluor 647                | ThermoFisher    | RRID:AB_2535866  | 1:1000 IHC             |
| IR DYE 680RD Goat anti-Mouse                     | Licor           | RRID:AB_10956588 | 1:10000 WB             |
| IR DYE 800RD Goat anti-Rabbit                    | Licor           | RRID:AB_621843   | 1:10000 WB             |
|                                                  |                 |                  |                        |
| <b>Chemicals</b>                                 |                 |                  |                        |
| pSIVA                                            | Novous Bio      | NBP2-29382       |                        |
| Calcein AM Blue                                  | ThermoFisher    | C1429            |                        |
| F2N12S                                           | ThermoFisher    | A35137           |                        |
| pHrodo Red AM                                    | ThermoFisher    | P35372           |                        |
| Dipotassium Bisperoxovanadium(pic) dihydrate     | Sigma/Merck     | SML0885          |                        |
| Revert Total Protein Stain                       | Licor           | 926-11011        |                        |
| VECTASHIELD Hardset antifade mounting medium,    | Vector Labs     | H-1400           |                        |
| DMEM F12                                         | ThermoFisher    | 11320033         |                        |

|                                                                           |                                 |                         |  |
|---------------------------------------------------------------------------|---------------------------------|-------------------------|--|
| Live Cell Imaging Solution                                                | ThermoFisher                    | A14291DJ                |  |
| Odyssey Blocking buffer in TBS                                            | Licor                           | 927-50000               |  |
| Neurobasal Medium                                                         | ThermoFisher                    | 21103049                |  |
| B27 Supplement                                                            | ThermoFisher                    | 17504044                |  |
| Lipofectamine 2000                                                        | ThermoFisher                    | 11668019                |  |
| Lamda Phosphatase                                                         | NEB                             | P0753S                  |  |
|                                                                           |                                 |                         |  |
|                                                                           |                                 |                         |  |
| <b>Experimental Models: Organisms/Strains</b>                             |                                 |                         |  |
| 129S6.Cg-Tg(Camk2a-tTA)1Mmay/JlwsJ;<br>Fgf14Tg(tetO-MAPT*P301L)4510Kha/J. | Jackson<br>Laboratory           | RRID:IMSR_JAX:024854    |  |
| B6.129P2(Cg)-Cx3cr1tm1Litt/J                                              | Jackson<br>Laboratory           | RRID:IMSR_JAX:005582    |  |
| K3                                                                        | In house                        | Ittner et al. PNAS 2008 |  |
| APP23                                                                     | Jackson<br>Laboratory           | RRID:IMSR_JAX:030504    |  |
|                                                                           |                                 |                         |  |
| <b>Software</b>                                                           |                                 |                         |  |
| Prism 7                                                                   | GraphPad                        | RRID:SCR_002798         |  |
| FIJI                                                                      | NIH                             | RRID:SCR_002285         |  |
| Imaris 9.4.2                                                              | Bitplane                        | RRID:SCR_007370         |  |
| Image Studio Software                                                     | LI-COR                          | RRID:SCR_015795         |  |
| Huygens Deconvolution                                                     | Scientific<br>Volume<br>Imaging | RRID:SCR_014237         |  |
|                                                                           |                                 |                         |  |
|                                                                           |                                 |                         |  |

# Supplemental Figure 1

a

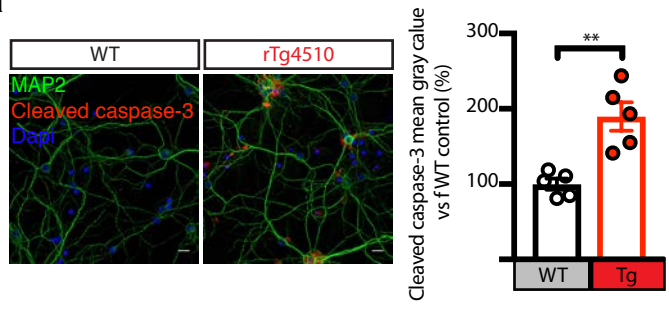

# Supplemental Figure 2

**A**

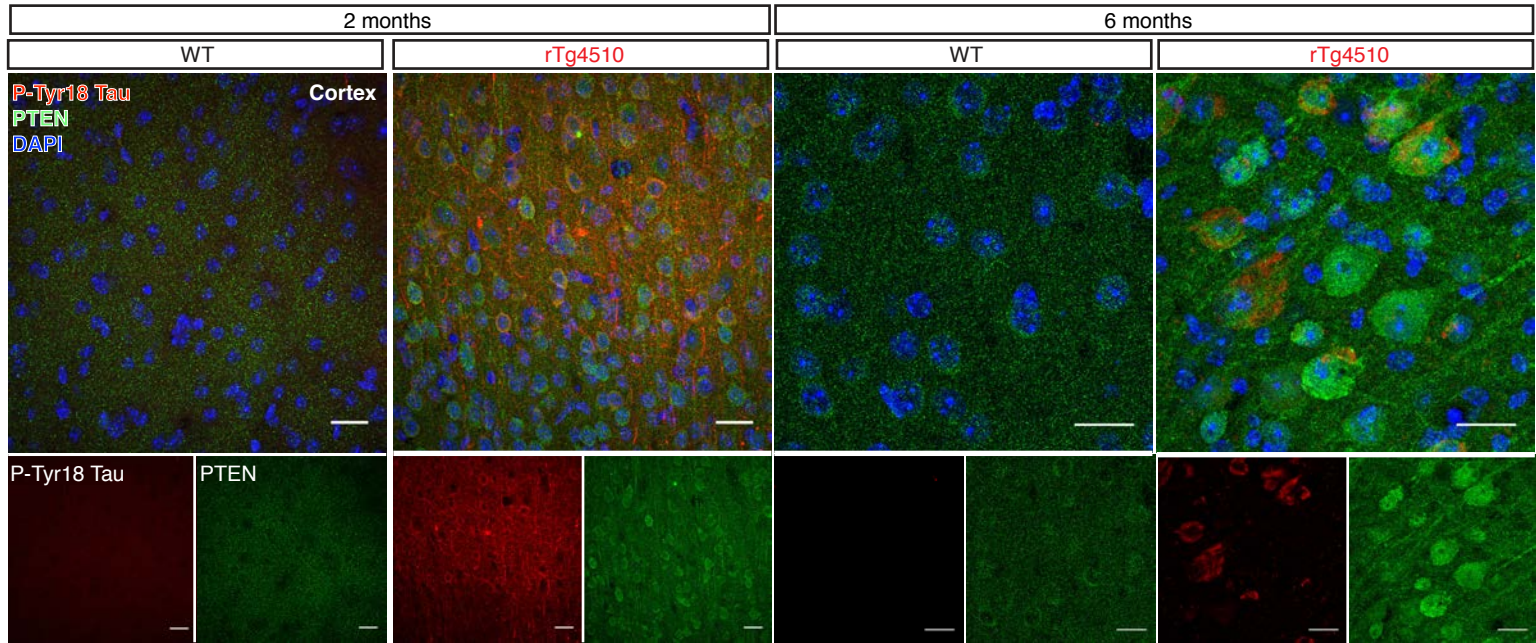

**B**

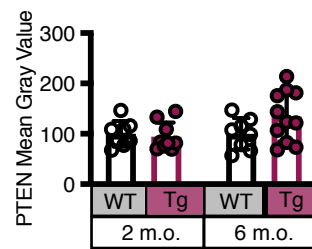

**C**

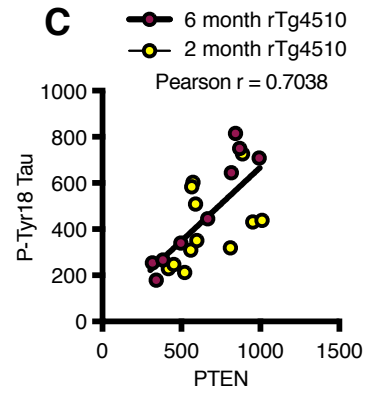

# Supplemental Figure 3

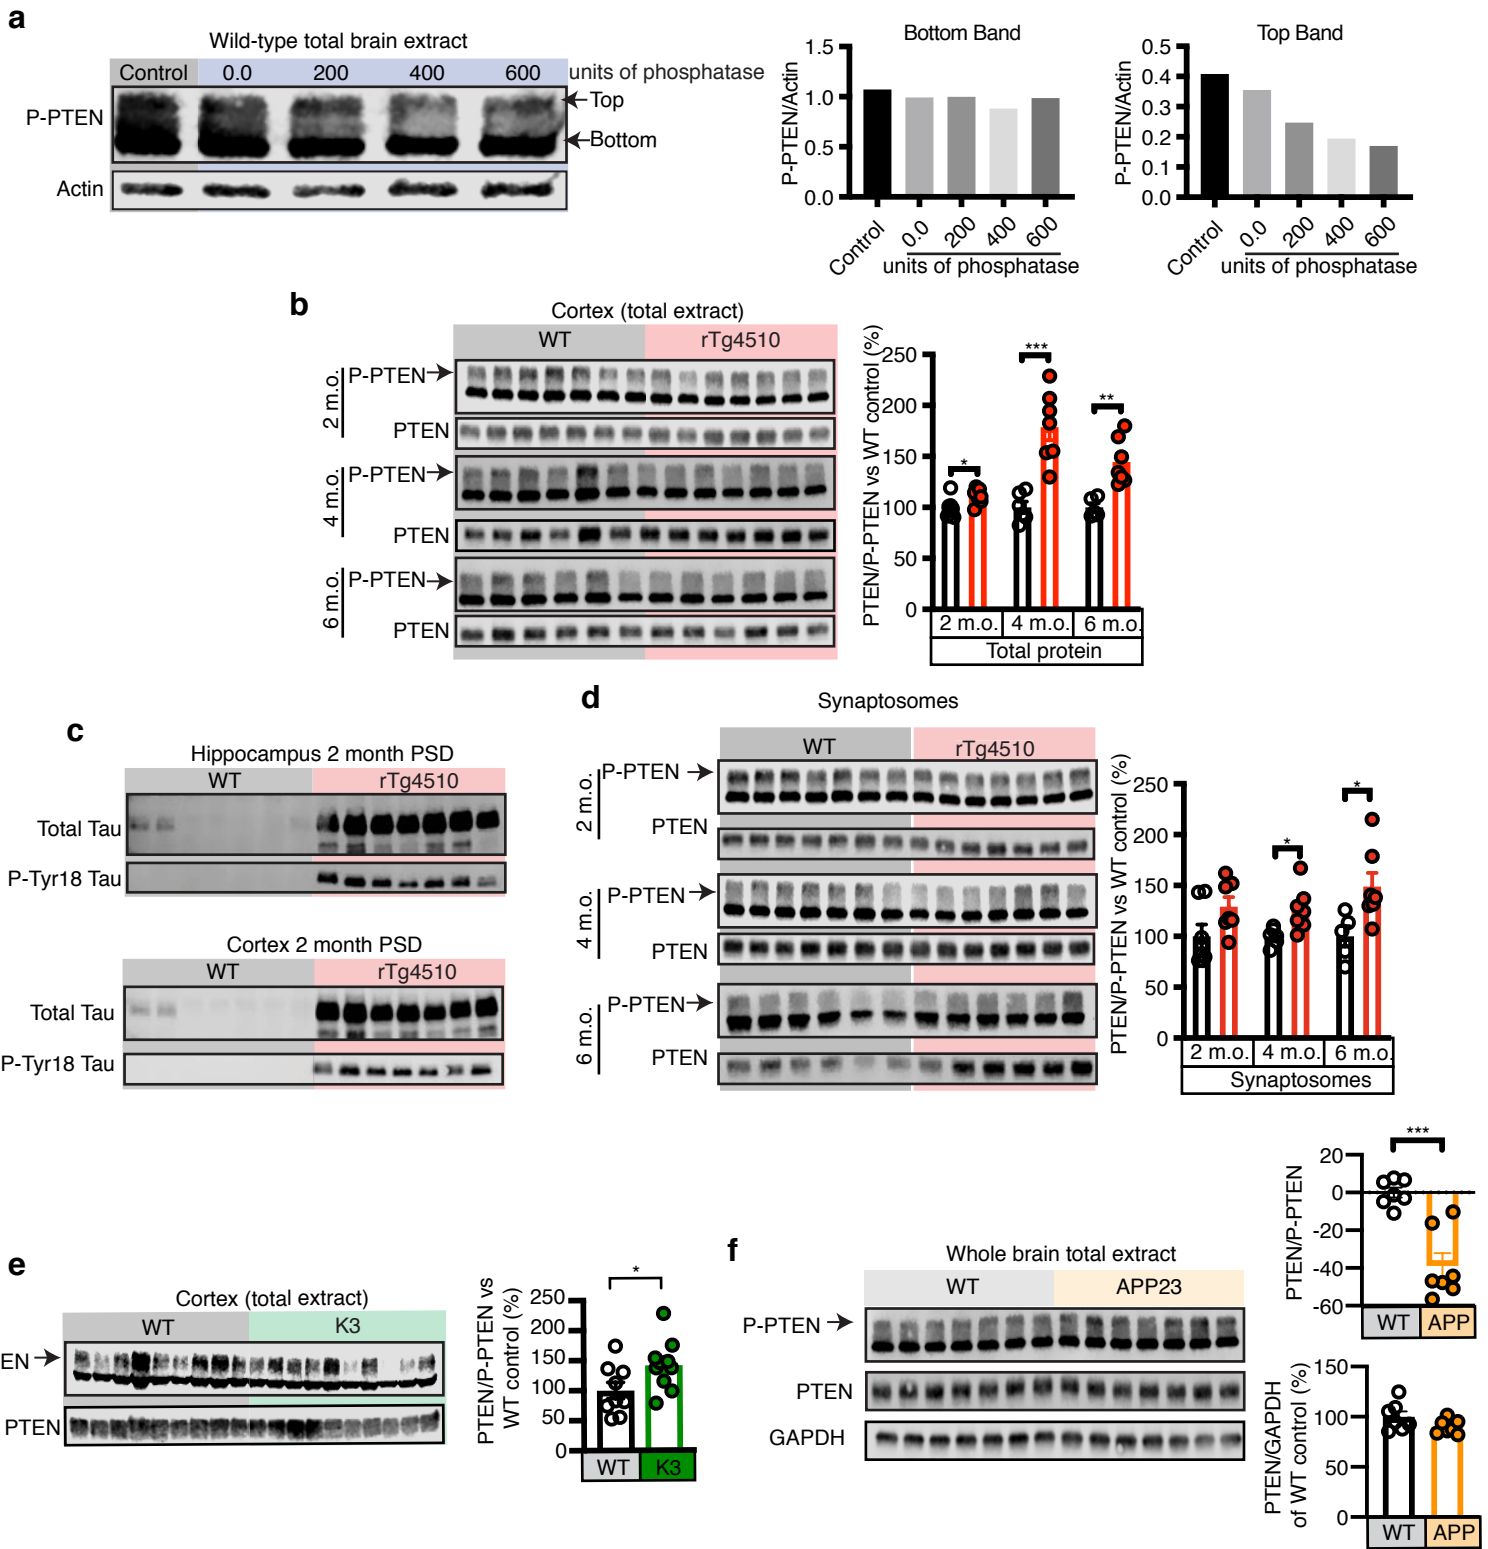

# Supplemental figure 4

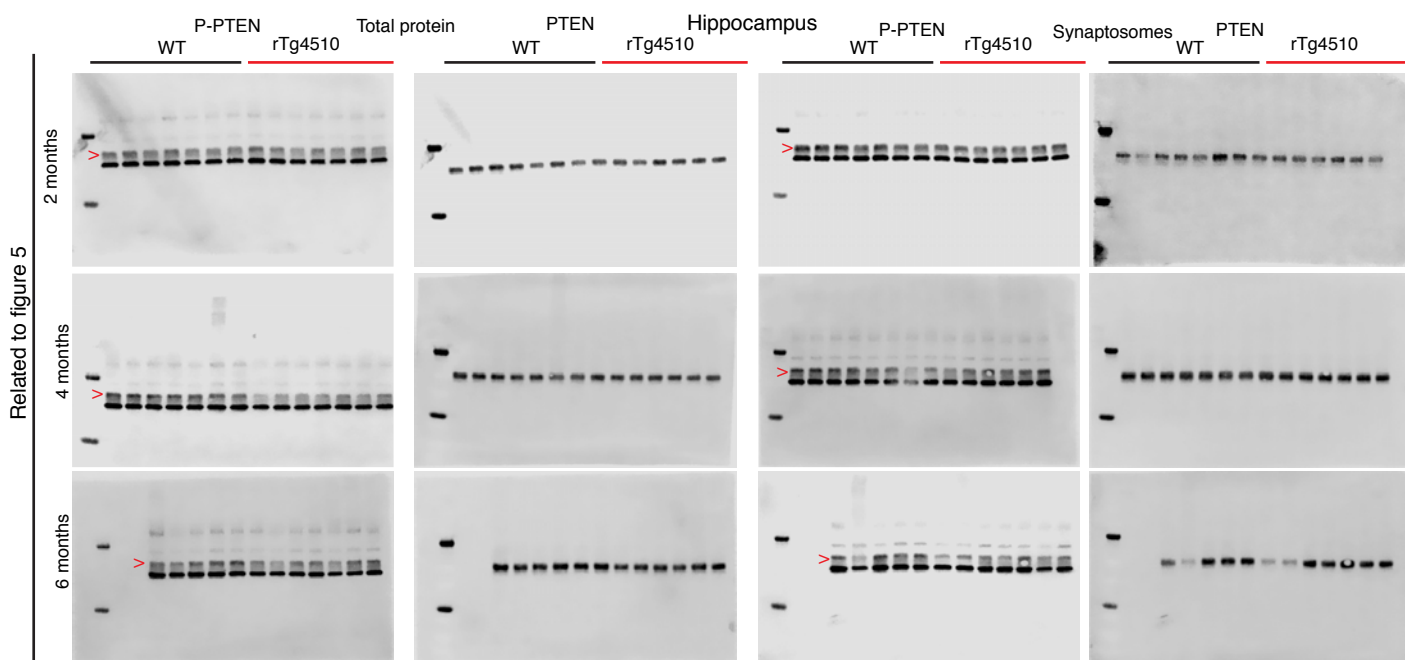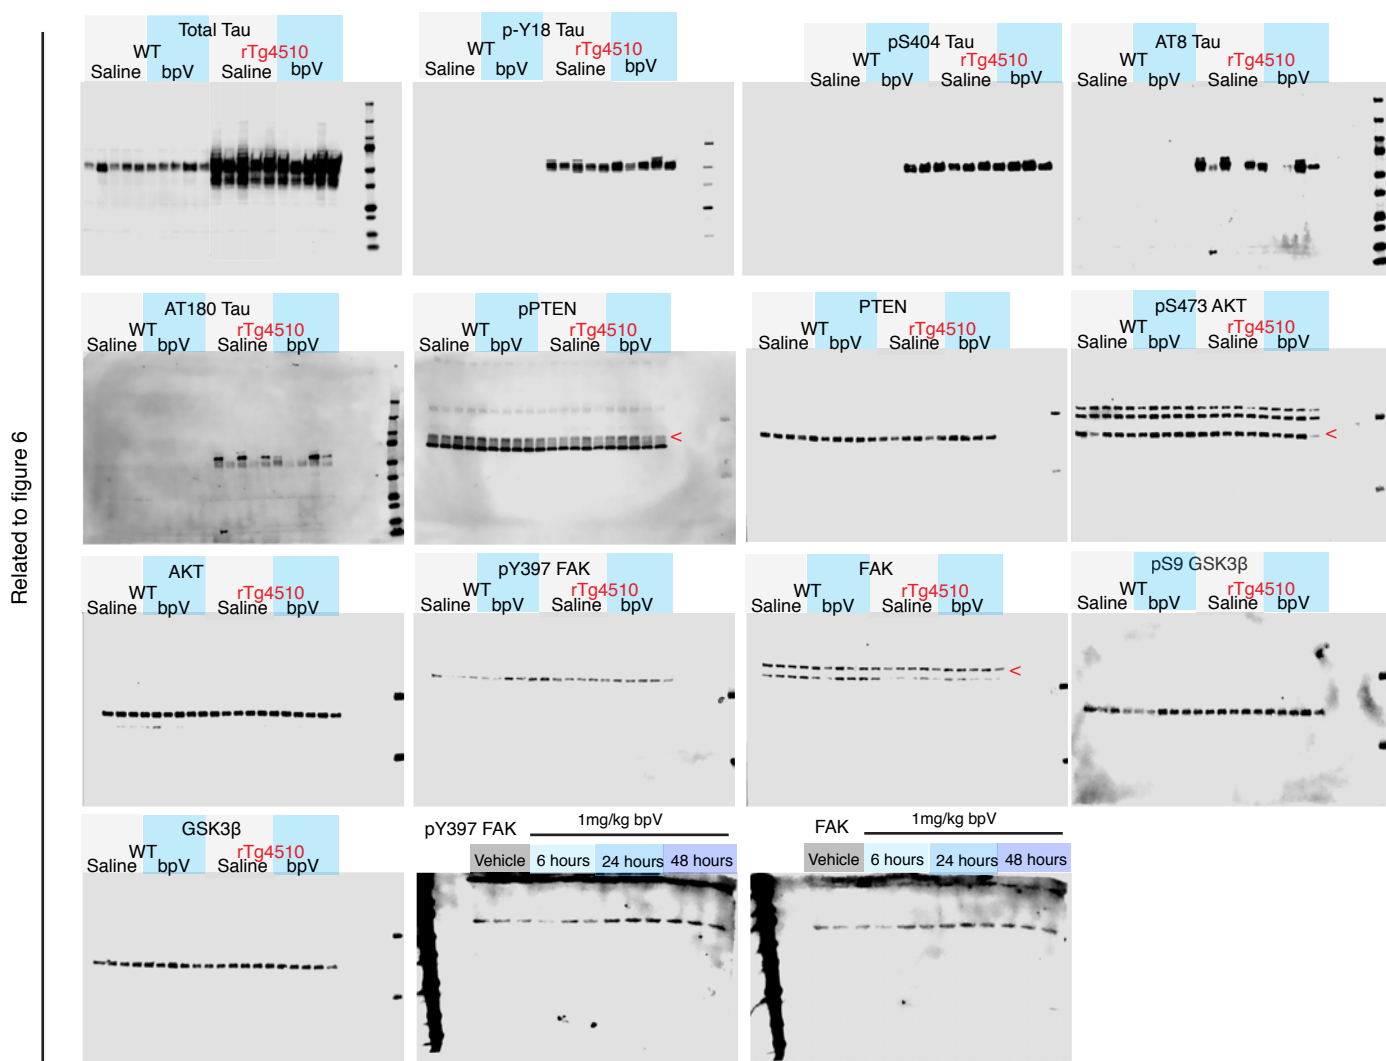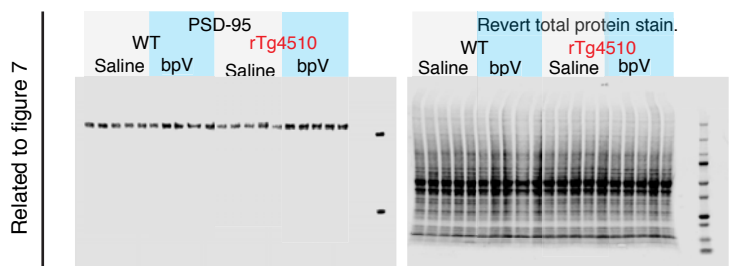

# Supplemental figure 5

## Human frontal cortex (total extract)

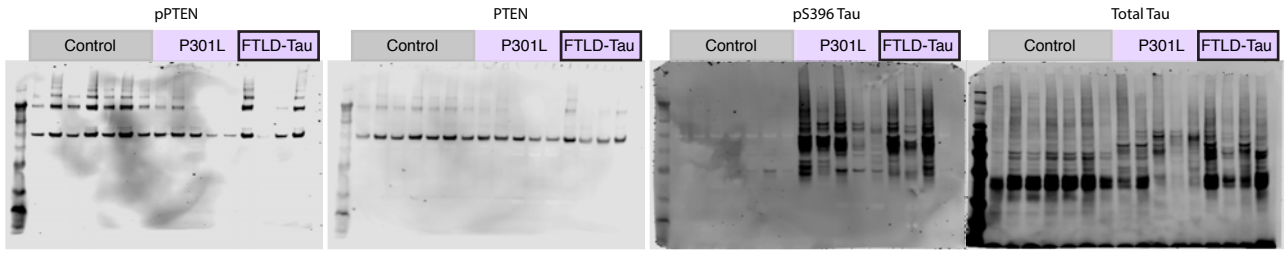

## Gapdh

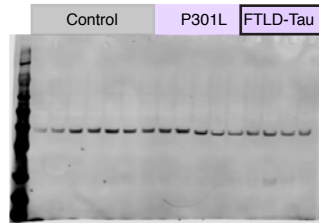

Related to figure 8

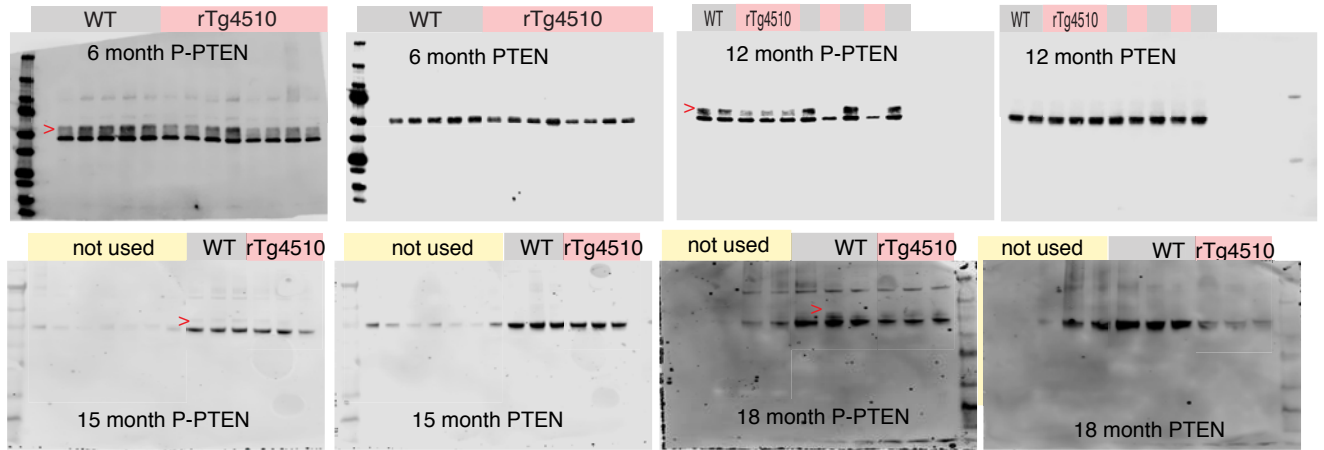

Supplement: 401_2020_2151_MOESM1_ESM.pdf [file 401_2020_2151_MOESM1_ESM.pdf]
